# Supplementary material
Source: MDPI journal article supplement (https://www.mdpi.com/2035-8148/11/3/11)
Supplement: s1 [file s1]

**Table S1.** Demographics and baseline clinical characteristics of the patients included for histological and imaging analysis.

| Patient | Type of presentation | Age/Gender | Race             | Hypertension | Diabetes | CHF | LVEF % | Diastolic dysfunction | QRS Duration | LBBB  | Amyloid Type |
|---------|----------------------|------------|------------------|--------------|----------|-----|--------|-----------------------|--------------|-------|--------------|
|         | SOB on Exertion      | 83 M       | Caucasian        | No           | No       | No  | 63     | 0                     | 94           | No    | ATTR         |
| 2       | CHF exacerbation     | 78 F       | African American | Yes          | No       | Yes | 55     | 3                     | 90           | No    | ATTR         |
| 3       | SOB on exertion      | 56 M       | Caucasian        | No           | No       | Yes | 58     | 2                     | No EKG       | No    | AL           |
| 4       | CHF Exacerbation     | 78 F       | Caucasian        | Yes          | No       | Yes | 58     | 1                     | 148          | No    | AL           |
| 5       | SOB on exertion      | 61 M       | Caucasian        | No           | No       | Yes | 35     | 0                     | 99           | No    | ATTR         |
| 6       | SOB on exertion      | 71 M       | Caucasian        | Yes          | No       | Yes | 58     | 3                     | 128          | Yes   | ATTR         |
| 7       | Acute MI             | 64 M       | Caucasian        | No           | No       | No  | 43     | 3                     | 106          | No    | AL           |
| 8       | SOB, NSTEMI, CHF     | 60 F       | Caucasian        | No           | No       | No  | 53     | 0                     | 90           | No    | AL           |
| 9       | SOB, CP              | 57 M       | African American | No           | No       | Yes | 33     | 0                     | 96           | No    | AL           |
| 10      | SOB, edema           | 83 M       | Caucasian        | Yes          | No       | Yes | 38     | 0                     | 108          | No    | ATTR         |
| 11      | Weakness             | 61 M       | Caucasian        | Yes          | Yes      | Yes | 58     | 0                     | 88           | No    | AL           |
| 12      | DOE                  | 79 M       | Caucasian        | No           | No       | Yes | 58     | 3                     | 98           | No    | ATTR         |
| 13      | Dyspnea              | 69 F       | African American | Yes          | No       | Yes | 75     | 3                     | 98           | No    | AL           |
| 14      | DOE, edema           | 62 F       | Caucasian        | No           | No       | No  | 68     | 0                     | 90           | No    | AL           |
| 15      | DOE                  | 85 M       | Caucasian        | No           | Yes      | No  | 58     | 3                     | 126          | No    | ATTR         |
| 16      | Dyspnea              | 78 M       | Caucasian        | No           | No       | Yes | 43     | 0                     | 223          | Paced | ATTR         |
| 17      | LUE weak             | 84 M       | African American | Yes          | No       | Yes | 58     | 3                     | 161          | Yes   | Small sample |
| 18      | CHF                  | 67 M       | African American | Yes          | No       | Yes | 33     | 2                     | 88           | No    | ATTR         |
| 19      | Dyspnea              | 80 M       | Caucasian        | No           | No       | Yes | 23     | 0                     | 87           | Paced | ATTR         |

Abbreviations: CHF - Congestive Heart Failure, CP - Chest Pain, DOE - Dyspnea on Exertion, LUE - Left Upper Extremity, LVEF – Left Ventricular Ejection Fraction, MI - Myocardial Infarction, NSTEMI - Non- ST Elevation Myocardial Infarction, SOB – Shortness of Breath.
